# Supplementary material
Source: PubMed Central journal article supplement (PMC3072550)
Supplement: supp_btr085_R2_supplement_revised.pdf [file supp_btr085_R2_supplement_revised.pdf]

Table 1: **Frequency of ambiguously mapping read counts for various read lengths.** For each read length, 100,000 fusions were randomly generated. Then for each of these fusions, 200 read pairs spanning the fusion site were generated. The number of read pairs out of these 200 that mapped ambiguously was tabulated. Below is a table of the frequency of ambiguous read pair counts for different read lengths.

| Ambiguous<br>Read Count<br>(out of 200) | Read<br>Length<br>30 | Read<br>Length<br>35 | Read<br>Length<br>40 | Read<br>Length<br>45 | Read<br>Length<br>50 | Read<br>Length<br>75 | Read<br>Length<br>100 |
|-----------------------------------------|----------------------|----------------------|----------------------|----------------------|----------------------|----------------------|-----------------------|
| 0                                       | 63,997               | 72,146               | 77,400               | 80,247               | 82,040               | 86,938               | 89,202                |
| 1                                       | 1,733                | 1,493                | 435                  | 344                  | 417                  | 140                  | 156                   |
| 2                                       | 1,205                | 801                  | 738                  | 324                  | 248                  | 114                  | 76                    |
| 3                                       | 1,610                | 491                  | 364                  | 331                  | 248                  | 88                   | 72                    |
| 4                                       | 958                  | 886                  | 354                  | 224                  | 223                  | 100                  | 51                    |
| 5                                       | 799                  | 619                  | 418                  | 264                  | 161                  | 113                  | 87                    |
| 6                                       | 967                  | 413                  | 246                  | 282                  | 123                  | 121                  | 63                    |
| 7                                       | 745                  | 458                  | 237                  | 194                  | 144                  | 102                  | 64                    |
| 8                                       | 624                  | 378                  | 256                  | 185                  | 166                  | 88                   | 84                    |
| 9                                       | 688                  | 328                  | 201                  | 281                  | 140                  | 89                   | 78                    |
| 10                                      | 503                  | 306                  | 251                  | 142                  | 134                  | 83                   | 78                    |
| 11                                      | 526                  | 291                  | 265                  | 146                  | 161                  | 119                  | 80                    |
| 12                                      | 650                  | 262                  | 232                  | 138                  | 161                  | 99                   | 56                    |
| 13                                      | 475                  | 320                  | 197                  | 130                  | 141                  | 77                   | 67                    |
| 14                                      | 385                  | 267                  | 179                  | 119                  | 109                  | 67                   | 74                    |
| 15                                      | 431                  | 239                  | 184                  | 137                  | 131                  | 90                   | 51                    |
| 16                                      | 362                  | 230                  | 165                  | 131                  | 122                  | 81                   | 52                    |
| 17                                      | 347                  | 185                  | 213                  | 127                  | 131                  | 73                   | 54                    |
| 18                                      | 357                  | 202                  | 143                  | 169                  | 101                  | 74                   | 52                    |
| 19                                      | 309                  | 189                  | 137                  | 93                   | 123                  | 83                   | 46                    |
| 20                                      | 227                  | 172                  | 136                  | 115                  | 121                  | 72                   | 52                    |
| 21                                      | 272                  | 188                  | 130                  | 125                  | 111                  | 88                   | 65                    |
| 22                                      | 281                  | 166                  | 112                  | 126                  | 111                  | 72                   | 52                    |
| 23                                      | 212                  | 147                  | 128                  | 153                  | 98                   | 61                   | 69                    |
| 24                                      | 277                  | 172                  | 101                  | 145                  | 89                   | 54                   | 57                    |
| 25                                      | 229                  | 158                  | 159                  | 99                   | 93                   | 66                   | 56                    |
| 26                                      | 202                  | 124                  | 131                  | 133                  | 85                   | 71                   | 61                    |
| 27                                      | 192                  | 134                  | 104                  | 114                  | 67                   | 64                   | 51                    |
| 28                                      | 215                  | 130                  | 117                  | 85                   | 75                   | 46                   | 47                    |
| 29                                      | 155                  | 167                  | 116                  | 86                   | 62                   | 54                   | 55                    |
| 30                                      | 256                  | 116                  | 141                  | 78                   | 58                   | 53                   | 51                    |
| 31                                      | 173                  | 129                  | 124                  | 113                  | 87                   | 57                   | 55                    |
| 32                                      | 144                  | 118                  | 115                  | 104                  | 90                   | 61                   | 63                    |
| 33                                      | 140                  | 122                  | 119                  | 93                   | 75                   | 51                   | 50                    |
| 34                                      | 174                  | 127                  | 111                  | 78                   | 70                   | 58                   | 59                    |
| 35                                      | 182                  | 109                  | 101                  | 70                   | 73                   | 56                   | 55                    |
| 36                                      | 163                  | 96                   | 106                  | 88                   | 91                   | 61                   | 38                    |
| 37                                      | 150                  | 101                  | 84                   | 93                   | 97                   | 56                   | 42                    |
| 38                                      | 138                  | 118                  | 64                   | 62                   | 65                   | 50                   | 33                    |
| 39                                      | 146                  | 159                  | 76                   | 79                   | 96                   | 70                   | 36                    |
| 40                                      | 156                  | 120                  | 88                   | 68                   | 99                   | 50                   | 31                    |
| 41                                      | 113                  | 91                   | 85                   | 90                   | 64                   | 68                   | 40                    |
| 42                                      | 132                  | 134                  | 75                   | 73                   | 77                   | 43                   | 47                    |
| 43                                      | 89                   | 95                   | 85                   | 87                   | 72                   | 52                   | 46                    |

Table 1 – Continued

| Ambiguous<br>Read Count<br>(out of 200) | Read<br>Length<br>30 | Read<br>Length<br>35 | Read<br>Length<br>40 | Read<br>Length<br>45 | Read<br>Length<br>50 | Read<br>Length<br>75 | Read<br>Length<br>100 |
|-----------------------------------------|----------------------|----------------------|----------------------|----------------------|----------------------|----------------------|-----------------------|
| 44                                      | 114                  | 107                  | 103                  | 73                   | 69                   | 45                   | 48                    |
| 45                                      | 117                  | 112                  | 82                   | 70                   | 40                   | 60                   | 54                    |
| 46                                      | 107                  | 87                   | 99                   | 74                   | 50                   | 52                   | 43                    |
| 47                                      | 117                  | 98                   | 110                  | 58                   | 73                   | 31                   | 43                    |
| 48                                      | 106                  | 91                   | 86                   | 67                   | 72                   | 51                   | 32                    |
| 49                                      | 118                  | 73                   | 60                   | 55                   | 64                   | 53                   | 37                    |
| 50                                      | 105                  | 89                   | 78                   | 75                   | 59                   | 61                   | 51                    |
| 51                                      | 100                  | 96                   | 85                   | 75                   | 78                   | 49                   | 55                    |
| 52                                      | 114                  | 75                   | 80                   | 67                   | 77                   | 63                   | 47                    |
| 53                                      | 105                  | 89                   | 69                   | 83                   | 72                   | 65                   | 40                    |
| 54                                      | 83                   | 87                   | 60                   | 54                   | 52                   | 59                   | 40                    |
| 55                                      | 93                   | 86                   | 76                   | 72                   | 56                   | 50                   | 33                    |
| 56                                      | 97                   | 55                   | 81                   | 60                   | 60                   | 70                   | 39                    |
| 57                                      | 124                  | 122                  | 73                   | 61                   | 56                   | 49                   | 37                    |
| 58                                      | 111                  | 89                   | 68                   | 52                   | 48                   | 53                   | 47                    |
| 59                                      | 67                   | 78                   | 61                   | 65                   | 54                   | 40                   | 48                    |
| 60                                      | 83                   | 107                  | 82                   | 65                   | 96                   | 32                   | 39                    |
| 61                                      | 89                   | 68                   | 78                   | 52                   | 86                   | 50                   | 39                    |
| 62                                      | 109                  | 85                   | 75                   | 59                   | 68                   | 62                   | 37                    |
| 63                                      | 112                  | 77                   | 63                   | 61                   | 46                   | 42                   | 31                    |
| 64                                      | 85                   | 54                   | 67                   | 69                   | 86                   | 61                   | 33                    |
| 65                                      | 78                   | 61                   | 65                   | 52                   | 47                   | 32                   | 35                    |
| 66                                      | 82                   | 71                   | 51                   | 59                   | 56                   | 46                   | 35                    |
| 67                                      | 94                   | 54                   | 52                   | 74                   | 63                   | 36                   | 32                    |
| 68                                      | 82                   | 72                   | 55                   | 70                   | 69                   | 39                   | 20                    |
| 69                                      | 84                   | 72                   | 55                   | 87                   | 60                   | 31                   | 29                    |
| 70                                      | 100                  | 72                   | 63                   | 56                   | 41                   | 42                   | 27                    |
| 71                                      | 108                  | 56                   | 73                   | 63                   | 55                   | 34                   | 36                    |
| 72                                      | 68                   | 50                   | 58                   | 71                   | 50                   | 42                   | 38                    |
| 73                                      | 68                   | 56                   | 60                   | 65                   | 44                   | 57                   | 33                    |
| 74                                      | 86                   | 62                   | 84                   | 63                   | 58                   | 44                   | 34                    |
| 75                                      | 65                   | 55                   | 51                   | 52                   | 53                   | 48                   | 35                    |
| 76                                      | 90                   | 74                   | 60                   | 55                   | 51                   | 49                   | 30                    |
| 77                                      | 114                  | 75                   | 66                   | 72                   | 45                   | 59                   | 30                    |
| 78                                      | 94                   | 62                   | 72                   | 67                   | 46                   | 43                   | 27                    |
| 79                                      | 72                   | 78                   | 61                   | 75                   | 46                   | 41                   | 27                    |
| 80                                      | 94                   | 75                   | 59                   | 48                   | 49                   | 35                   | 32                    |
| 81                                      | 78                   | 71                   | 67                   | 54                   | 77                   | 41                   | 28                    |
| 82                                      | 61                   | 82                   | 46                   | 53                   | 40                   | 43                   | 26                    |
| 83                                      | 69                   | 74                   | 68                   | 50                   | 65                   | 40                   | 31                    |
| 84                                      | 73                   | 71                   | 63                   | 78                   | 72                   | 31                   | 38                    |
| 85                                      | 71                   | 57                   | 64                   | 59                   | 59                   | 28                   | 21                    |
| 86                                      | 75                   | 59                   | 51                   | 69                   | 58                   | 29                   | 33                    |
| 87                                      | 74                   | 61                   | 43                   | 46                   | 49                   | 60                   | 37                    |
| 88                                      | 57                   | 79                   | 57                   | 55                   | 34                   | 30                   | 37                    |
| 89                                      | 67                   | 80                   | 70                   | 54                   | 42                   | 35                   | 22                    |
| 90                                      | 80                   | 66                   | 61                   | 56                   | 57                   | 47                   | 29                    |

Table 1 – Continued

| Ambiguous<br>Read Count<br>(out of 200) | Read<br>Length<br>30 | Read<br>Length<br>35 | Read<br>Length<br>40 | Read<br>Length<br>45 | Read<br>Length<br>50 | Read<br>Length<br>75 | Read<br>Length<br>100 |
|-----------------------------------------|----------------------|----------------------|----------------------|----------------------|----------------------|----------------------|-----------------------|
| 91                                      | 71                   | 81                   | 77                   | 58                   | 54                   | 40                   | 46                    |
| 92                                      | 68                   | 73                   | 57                   | 45                   | 63                   | 38                   | 31                    |
| 93                                      | 60                   | 59                   | 46                   | 57                   | 56                   | 24                   | 32                    |
| 94                                      | 71                   | 52                   | 68                   | 53                   | 41                   | 25                   | 41                    |
| 95                                      | 77                   | 69                   | 62                   | 63                   | 39                   | 44                   | 33                    |
| 96                                      | 75                   | 82                   | 39                   | 41                   | 44                   | 33                   | 34                    |
| 97                                      | 62                   | 57                   | 53                   | 30                   | 54                   | 35                   | 27                    |
| 98                                      | 58                   | 62                   | 77                   | 40                   | 73                   | 44                   | 36                    |
| 99                                      | 69                   | 58                   | 56                   | 30                   | 54                   | 39                   | 33                    |
| 100                                     | 55                   | 50                   | 54                   | 48                   | 65                   | 38                   | 34                    |
| 101                                     | 70                   | 58                   | 71                   | 55                   | 44                   | 32                   | 28                    |
| 102                                     | 91                   | 57                   | 62                   | 60                   | 55                   | 27                   | 28                    |
| 103                                     | 60                   | 76                   | 50                   | 46                   | 46                   | 23                   | 32                    |
| 104                                     | 56                   | 73                   | 57                   | 35                   | 50                   | 34                   | 46                    |
| 105                                     | 56                   | 64                   | 66                   | 49                   | 47                   | 33                   | 35                    |
| 106                                     | 72                   | 62                   | 45                   | 32                   | 50                   | 31                   | 51                    |
| 107                                     | 55                   | 50                   | 49                   | 47                   | 65                   | 29                   | 51                    |
| 108                                     | 59                   | 60                   | 52                   | 62                   | 61                   | 23                   | 41                    |
| 109                                     | 71                   | 58                   | 51                   | 57                   | 59                   | 16                   | 51                    |
| 110                                     | 69                   | 65                   | 50                   | 67                   | 60                   | 22                   | 36                    |
| 111                                     | 51                   | 59                   | 58                   | 65                   | 61                   | 20                   | 18                    |
| 112                                     | 66                   | 57                   | 57                   | 43                   | 59                   | 33                   | 34                    |
| 113                                     | 64                   | 48                   | 42                   | 64                   | 55                   | 29                   | 25                    |
| 114                                     | 57                   | 49                   | 57                   | 49                   | 43                   | 39                   | 39                    |
| 115                                     | 71                   | 41                   | 49                   | 55                   | 38                   | 41                   | 24                    |
| 116                                     | 56                   | 60                   | 67                   | 59                   | 39                   | 33                   | 31                    |
| 117                                     | 50                   | 34                   | 42                   | 60                   | 38                   | 35                   | 33                    |
| 118                                     | 47                   | 59                   | 51                   | 57                   | 40                   | 47                   | 27                    |
| 119                                     | 64                   | 56                   | 44                   | 41                   | 42                   | 32                   | 17                    |
| 120                                     | 56                   | 57                   | 39                   | 57                   | 39                   | 39                   | 26                    |
| 121                                     | 62                   | 57                   | 54                   | 64                   | 44                   | 36                   | 19                    |
| 122                                     | 55                   | 55                   | 68                   | 58                   | 40                   | 44                   | 28                    |
| 123                                     | 45                   | 58                   | 74                   | 65                   | 38                   | 27                   | 21                    |
| 124                                     | 71                   | 62                   | 42                   | 55                   | 51                   | 46                   | 27                    |
| 125                                     | 54                   | 75                   | 67                   | 54                   | 27                   | 49                   | 23                    |
| 126                                     | 59                   | 57                   | 63                   | 45                   | 49                   | 36                   | 23                    |
| 127                                     | 64                   | 45                   | 66                   | 49                   | 47                   | 42                   | 34                    |
| 128                                     | 58                   | 54                   | 58                   | 55                   | 35                   | 34                   | 21                    |
| 129                                     | 58                   | 50                   | 64                   | 51                   | 29                   | 48                   | 23                    |
| 130                                     | 68                   | 60                   | 60                   | 54                   | 25                   | 71                   | 27                    |
| 131                                     | 55                   | 60                   | 39                   | 50                   | 31                   | 51                   | 28                    |
| 132                                     | 59                   | 64                   | 59                   | 25                   | 40                   | 65                   | 36                    |
| 133                                     | 59                   | 74                   | 64                   | 28                   | 51                   | 54                   | 28                    |
| 134                                     | 66                   | 45                   | 51                   | 34                   | 42                   | 58                   | 37                    |
| 135                                     | 61                   | 61                   | 60                   | 52                   | 34                   | 46                   | 29                    |
| 136                                     | 83                   | 65                   | 82                   | 53                   | 33                   | 32                   | 27                    |
| 137                                     | 61                   | 57                   | 53                   | 48                   | 40                   | 28                   | 26                    |

Table 1 – Continued

| Ambiguous<br>Read Count<br>(out of 200) | Read<br>Length<br>30 | Read<br>Length<br>35 | Read<br>Length<br>40 | Read<br>Length<br>45 | Read<br>Length<br>50 | Read<br>Length<br>75 | Read<br>Length<br>100 |
|-----------------------------------------|----------------------|----------------------|----------------------|----------------------|----------------------|----------------------|-----------------------|
| 138                                     | 88                   | 63                   | 52                   | 50                   | 34                   | 28                   | 18                    |
| 139                                     | 66                   | 64                   | 49                   | 46                   | 55                   | 36                   | 20                    |
| 140                                     | 69                   | 71                   | 59                   | 40                   | 64                   | 24                   | 12                    |
| 141                                     | 71                   | 56                   | 51                   | 24                   | 59                   | 29                   | 22                    |
| 142                                     | 49                   | 47                   | 45                   | 49                   | 49                   | 31                   | 19                    |
| 143                                     | 57                   | 53                   | 55                   | 33                   | 48                   | 30                   | 16                    |
| 144                                     | 65                   | 70                   | 51                   | 38                   | 59                   | 32                   | 20                    |
| 145                                     | 59                   | 63                   | 42                   | 52                   | 62                   | 29                   | 27                    |
| 146                                     | 88                   | 80                   | 46                   | 61                   | 47                   | 23                   | 31                    |
| 147                                     | 72                   | 58                   | 47                   | 41                   | 41                   | 17                   | 26                    |
| 148                                     | 36                   | 60                   | 38                   | 37                   | 46                   | 18                   | 16                    |
| 149                                     | 77                   | 71                   | 58                   | 59                   | 46                   | 27                   | 22                    |
| 150                                     | 82                   | 56                   | 57                   | 63                   | 59                   | 21                   | 29                    |
| 151                                     | 69                   | 65                   | 50                   | 62                   | 51                   | 22                   | 23                    |
| 152                                     | 58                   | 50                   | 51                   | 56                   | 62                   | 23                   | 29                    |
| 153                                     | 64                   | 61                   | 55                   | 53                   | 47                   | 25                   | 23                    |
| 154                                     | 73                   | 50                   | 58                   | 67                   | 45                   | 21                   | 21                    |
| 155                                     | 64                   | 74                   | 59                   | 83                   | 93                   | 30                   | 28                    |
| 156                                     | 93                   | 66                   | 56                   | 68                   | 86                   | 29                   | 22                    |
| 157                                     | 65                   | 52                   | 60                   | 63                   | 83                   | 31                   | 26                    |
| 158                                     | 91                   | 77                   | 56                   | 76                   | 72                   | 26                   | 25                    |
| 159                                     | 67                   | 79                   | 57                   | 61                   | 59                   | 28                   | 23                    |
| 160                                     | 70                   | 64                   | 90                   | 97                   | 46                   | 23                   | 19                    |
| 161                                     | 76                   | 55                   | 70                   | 91                   | 39                   | 40                   | 23                    |
| 162                                     | 85                   | 64                   | 96                   | 96                   | 39                   | 29                   | 21                    |
| 163                                     | 49                   | 63                   | 55                   | 75                   | 29                   | 25                   | 24                    |
| 164                                     | 62                   | 75                   | 65                   | 62                   | 38                   | 24                   | 19                    |
| 165                                     | 86                   | 119                  | 100                  | 54                   | 27                   | 22                   | 17                    |
| 166                                     | 85                   | 77                   | 98                   | 48                   | 58                   | 26                   | 20                    |
| 167                                     | 84                   | 85                   | 98                   | 48                   | 38                   | 25                   | 16                    |
| 168                                     | 67                   | 90                   | 94                   | 40                   | 39                   | 24                   | 13                    |
| 169                                     | 78                   | 83                   | 94                   | 45                   | 28                   | 29                   | 15                    |
| 170                                     | 106                  | 124                  | 62                   | 26                   | 39                   | 35                   | 11                    |
| 171                                     | 92                   | 124                  | 49                   | 35                   | 40                   | 30                   | 22                    |
| 172                                     | 104                  | 137                  | 72                   | 47                   | 37                   | 23                   | 15                    |
| 173                                     | 105                  | 104                  | 36                   | 49                   | 46                   | 17                   | 16                    |
| 174                                     | 112                  | 99                   | 62                   | 41                   | 36                   | 20                   | 20                    |
| 175                                     | 104                  | 79                   | 42                   | 44                   | 47                   | 29                   | 22                    |
| 176                                     | 124                  | 83                   | 51                   | 63                   | 52                   | 27                   | 19                    |
| 177                                     | 152                  | 70                   | 35                   | 41                   | 38                   | 26                   | 20                    |
| 178                                     | 144                  | 53                   | 48                   | 36                   | 51                   | 29                   | 18                    |
| 179                                     | 126                  | 66                   | 52                   | 38                   | 26                   | 24                   | 16                    |
| 180                                     | 89                   | 50                   | 46                   | 48                   | 33                   | 36                   | 18                    |
| 181                                     | 102                  | 51                   | 49                   | 37                   | 43                   | 32                   | 21                    |
| 182                                     | 101                  | 33                   | 44                   | 39                   | 44                   | 16                   | 26                    |
| 183                                     | 74                   | 47                   | 57                   | 50                   | 60                   | 29                   | 19                    |
| 184                                     | 76                   | 41                   | 42                   | 50                   | 45                   | 31                   | 25                    |

Table 1 – Continued

| <b>Ambiguous<br/>Read Count<br/>(out of 200)</b> | <b>Read<br/>Length<br/>30</b> | <b>Read<br/>Length<br/>35</b> | <b>Read<br/>Length<br/>40</b> | <b>Read<br/>Length<br/>45</b> | <b>Read<br/>Length<br/>50</b> | <b>Read<br/>Length<br/>75</b> | <b>Read<br/>Length<br/>100</b> |
|--------------------------------------------------|-------------------------------|-------------------------------|-------------------------------|-------------------------------|-------------------------------|-------------------------------|--------------------------------|
| <b>185</b>                                       | 77                            | 61                            | 46                            | 31                            | 43                            | 38                            | 28                             |
| <b>186</b>                                       | 79                            | 48                            | 38                            | 24                            | 36                            | 44                            | 31                             |
| <b>187</b>                                       | 66                            | 47                            | 37                            | 53                            | 43                            | 28                            | 30                             |
| <b>188</b>                                       | 60                            | 48                            | 59                            | 63                            | 29                            | 17                            | 59                             |
| <b>189</b>                                       | 62                            | 62                            | 38                            | 40                            | 32                            | 19                            | 41                             |
| <b>190</b>                                       | 76                            | 57                            | 33                            | 42                            | 26                            | 31                            | 51                             |
| <b>191</b>                                       | 62                            | 63                            | 39                            | 50                            | 19                            | 29                            | 57                             |
| <b>192</b>                                       | 39                            | 54                            | 65                            | 41                            | 28                            | 32                            | 62                             |
| <b>193</b>                                       | 64                            | 59                            | 71                            | 43                            | 28                            | 38                            | 52                             |
| <b>194</b>                                       | 78                            | 48                            | 36                            | 41                            | 32                            | 42                            | 54                             |
| <b>195</b>                                       | 60                            | 57                            | 46                            | 30                            | 46                            | 59                            | 55                             |
| <b>196</b>                                       | 57                            | 72                            | 63                            | 38                            | 44                            | 92                            | 59                             |
| <b>197</b>                                       | 59                            | 75                            | 59                            | 59                            | 76                            | 113                           | 79                             |
| <b>198</b>                                       | 84                            | 104                           | 145                           | 118                           | 151                           | 136                           | 186                            |
| <b>199</b>                                       | 254                           | 269                           | 300                           | 336                           | 346                           | 298                           | 421                            |
| <b>200</b>                                       | 5,673                         | 5,502                         | 5,060                         | 4,809                         | 4,548                         | 3,655                         | 2,856                          |

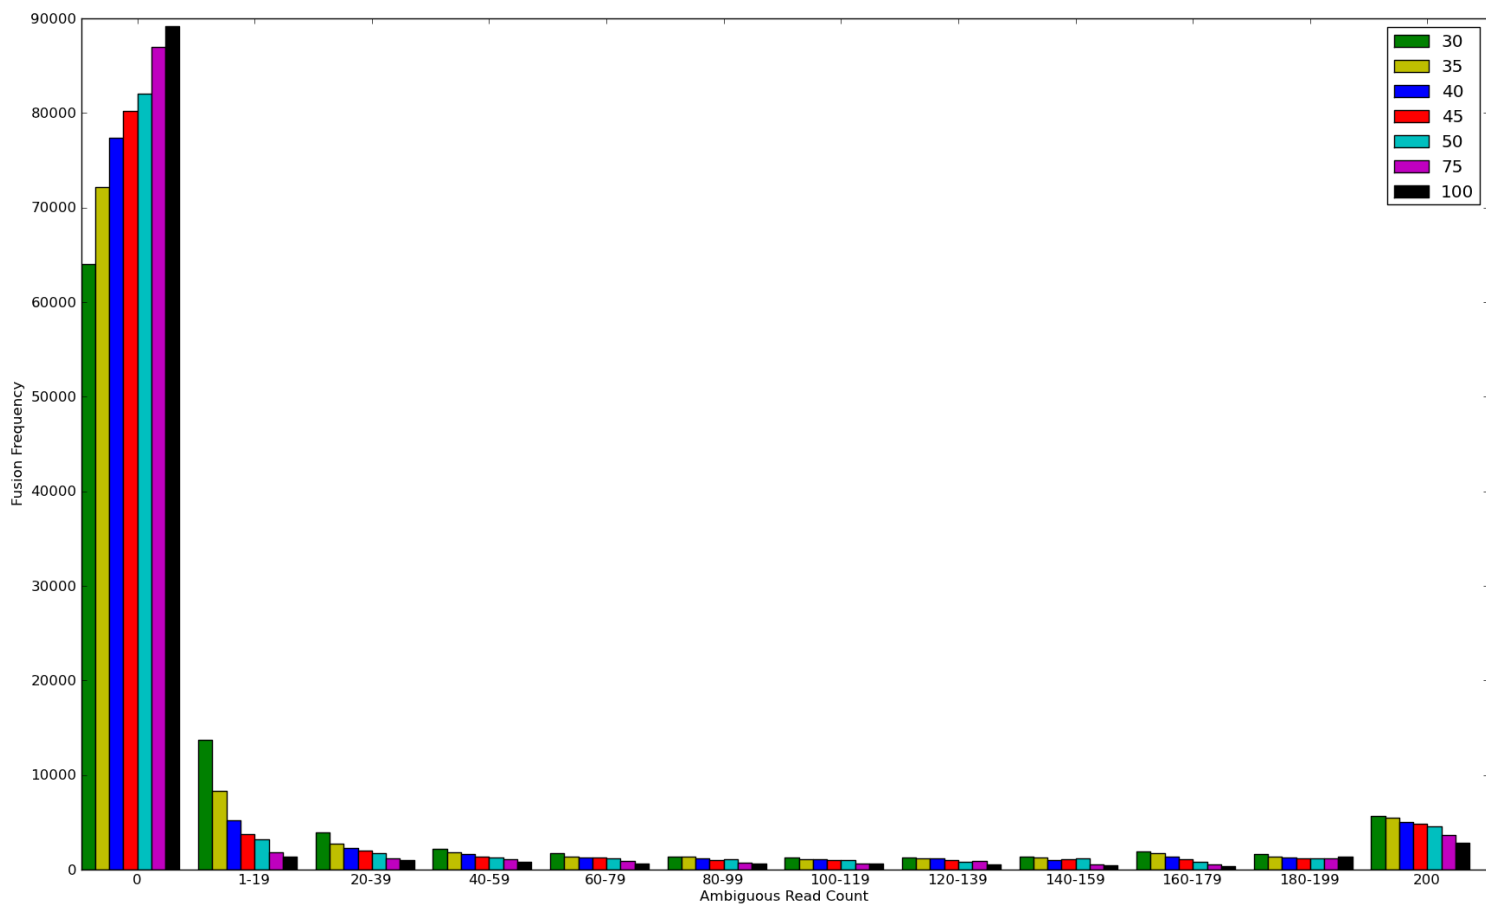

Figure 1: Graph of ambiguously mapping read count frequency data above.

Table 2: All gene fusions nominated by discordant read pairs in the simulated data.

| <b>Upstream Partner</b> | <b>Downstream Partner</b> |
|-------------------------|---------------------------|
| FOXO3B                  | EIF3C                     |
| FOXO3B                  | EIF3CL                    |
| FOXO3                   | EIF3C                     |
| FOXO3                   | EIF3CL                    |
| FRG1B                   | LOC162632                 |
| FRG1B                   | LOC220594                 |
| FRG1B                   | USP32                     |
| FRG1B                   | USP6                      |
| FRG1                    | LOC162632                 |
| FRG1                    | LOC220594                 |
| FRG1                    | USP32                     |
| FRG1                    | USP6                      |
| LOC283788               | LOC162632                 |
| LOC283788               | LOC220594                 |
| LOC283788               | USP32                     |
| LOC283788               | USP6                      |
| LOC642236               | LOC162632                 |
| LOC642236               | LOC220594                 |
| LOC642236               | USP32                     |
| LOC642236               | USP6                      |
| MAGED4B                 | MBD3L2                    |
| MAGED4B                 | MBD3L3                    |
| MAGED4B                 | MBD3L4                    |
| MAGED4B                 | MBD3L5                    |
| MAGED4                  | MBD3L2                    |
| MAGED4                  | MBD3L3                    |
| MAGED4                  | MBD3L4                    |
| MAGED4                  | MBD3L5                    |
| PSG10                   | PHB                       |
| PSG10                   | ZNF607                    |
| PSG11                   | PHB                       |
| PSG11                   | ZNF607                    |
| PSG1                    | PHB                       |
| PSG1                    | ZNF607                    |
| PSG2                    | PHB                       |
| PSG2                    | ZNF607                    |
| PSG3                    | PHB                       |
| PSG3                    | ZNF607                    |
| PSG4                    | PHB                       |
| PSG4                    | ZNF607                    |
| PSG5                    | PHB                       |
| PSG5                    | ZNF607                    |
| PSG6                    | PHB                       |
| PSG6                    | ZNF607                    |
| PSG7                    | PHB                       |
| PSG7                    | ZNF607                    |
| PSG8                    | PHB                       |
| PSG8                    | ZNF607                    |
| PSG9                    | PHB                       |

Table 2 – Continued

| <b>Upstream Partner</b> | <b>Downstream Partner</b> |
|-------------------------|---------------------------|
| PSG9                    | ZNF607                    |
| SMN1                    | CSAG1                     |
| SMN1                    | CSAG2                     |
| SMN1                    | CSAG3                     |
| SMN2                    | CSAG1                     |
| SMN2                    | CSAG2                     |
| SMN2                    | CSAG3                     |



Table 3: **Unambiguous fusion results from melanoma and UHR data.** In addition to the ambiguous fusions reported in the results section, our method returned many unambiguous fusions as well, and they are listed below. For the melanoma data, “Previously Reported” indicates whether the fusion was reported by Berger *et al.* Note that the criteria Berger used for reporting was different than that used here. Specifically, Berger required a read to cover the fusion point and excluded read-throughs present in existing databases. For the UHR data, “Previously Reported” indicates whether Maher *et al.* (2009b) reported the fusion. The UHR data used in this study is not the same as used by Maher, but both use sequencing of UHR. We note that all of the fusions reported by Berger are present in our results and nearly all of the read-throughs. The read-throughs we do not report are CDK2-RAB5B, PFKFB4-SCOTIN, FOXRED-TXN2, and C11orf51-C11orf59. The first three were found but excluded because coverage at the fusion site was less than one-twentieth overall coverage. The last was excluded because it lies within an intron of the RefSeq gene LRTOMT.

| 5' Gene        | Chromosome | 3' Gene   | Chromosome | Supporting Read Pairs | Previously Reported | Read-through |
|----------------|------------|-----------|------------|-----------------------|---------------------|--------------|
| <b>M000216</b> |            |           |            |                       |                     |              |
| RRM2           | 2          | C2orf48   | 2          | 12.0                  | No                  | Yes          |
| MFGES8         | 15         | HAPLN3    | 15         | 11.0                  | No                  | Yes          |
| CLN6           | 15         | CALML4    | 15         | 10.0                  | No                  | Yes          |
| ARG2           | 14         | RAD51L1   | 14         | 10.0                  | No                  | No           |
| KCTD2          | 17         | ARHGEF12  | 11         | 7.0                   | Yes                 | No           |
| RPL7           | 8          | EEF1A1    | 6          | 6.0                   | No                  | No           |
| TSC22D4        | 7          | C7orf61   | 7          | 6.0                   | No                  | Yes          |
| VAX2           | 2          | ATP6V1B1  | 2          | 5.0                   | No                  | Yes          |
| MGAT5          | 2          | LOC151162 | 2          | 4.0                   | No                  | Yes          |
| HSPE1          | 2          | MOBKL3    | 2          | 4.0                   | No                  | Yes          |
| MAGIX          | X          | PLP2      | X          | 3.0                   | No                  | Yes          |
| NDST2          | 10         | NEAT1     | 11         | 3.0                   | No                  | No           |
| MED20          | 6          | USP49     | 6          | 3.0                   | No                  | Yes          |
| ARHGEF12       | 11         | C16orf35  | 16         | 3.0                   | No                  | No           |
| GLT8D4         | 3          | PPP4R2    | 3          | 3.0                   | No                  | Yes          |
| ZHX1           | 8          | C8orf76   | 8          | 3.0                   | No                  | Yes          |
| SPP1           | 4          | BRI3BP    | 12         | 3.0                   | No                  | No           |
| <b>M000921</b> |            |           |            |                       |                     |              |
| RECK           | 9          | ALX3      | 1          | 34.0                  | Yes                 | No           |
| HBXIP          | 1          | OR2S2     | 9          | 19.0                  | No                  | No           |
| C15orf57       | 15         | CBX3      | 7          | 10.0                  | No                  | No           |
| HERC2          | 15         | MTMR15    | 15         | 8.0                   | No                  | No           |
| STYXL1         | 7          | TMEM120A  | 7          | 6.0                   | No                  | Yes          |
| ST6GALNAC6     | 9          | AK1       | 9          | 6.0                   | No                  | Yes          |
| SF3A2          | 19         | AMH       | 19         | 5.0                   | No                  | Yes          |
| STRADA         | 17         | LIMD2     | 17         | 5.0                   | No                  | Yes          |
| TIMM23         | 10         | BMS1P4    | 10         | 5.0                   | No                  | No           |
| APBB3          | 5          | SRA1      | 5          | 4.0                   | No                  | Yes          |
| BTBD8          | 1          | KIAA1107  | 1          | 4.0                   | No                  | Yes          |
| TMEM8B         | 9          | TLN1      | 9          | 4.0                   | Yes                 | No           |
| ASXL1          | 20         | RPL35     | 9          | 3.0                   | No                  | No           |
| ZNF594         | 17         | FLJ36492  | 17         | 3.0                   | No                  | No           |
| PIR            | X          | FIGF      | X          | 3.0                   | No                  | Yes          |
| ESRP1          | 8          | DPY19L4   | 8          | 3.0                   | Yes                 | Yes          |
| PFDN5          | 12         | C12orf10  | 12         | 3.0                   | No                  | Yes          |
| MTRF1L         | 6          | FBXO5     | 6          | 3.0                   | No                  | Yes          |

Table 3 – Continued

| 5' Gene        | Chromosome | 3' Gene      | Chromosome | Supporting Read Pairs | Previously Reported | Read-through |
|----------------|------------|--------------|------------|-----------------------|---------------------|--------------|
| BBS5           | 2          | KBTBD10      | 2          | 3.0                   | No                  | Yes          |
| HSPE1          | 2          | MOBKL3       | 2          | 3.0                   | No                  | Yes          |
| NPL            | 1          | DHX9         | 1          | 3.0                   | No                  | Yes          |
| GPATCH3        | 1          | GPN2         | 1          | 2.0                   | No                  | Yes          |
| KIAA1267       | 17         | LRRC37A      | 17         | 2.0                   | No                  | No           |
| WARS2          | 1          | NOTCH2       | 1          | 2.0                   | No                  | No           |
| VPS45          | 1          | PLEKHO1      | 1          | 2.0                   | No                  | Yes          |
| MAGIX          | X          | PLP2         | X          | 2.0                   | No                  | Yes          |
| LOC728613      | 5          | SDHA         | 5          | 2.0                   | No                  | No           |
| TRIM2          | 4          | MND1         | 4          | 2.0                   | No                  | Yes          |
| <b>M010403</b> |            |              |            |                       |                     |              |
| SMG5           | 1          | PAQR6        | 1          | 12.0                  | No                  | Yes          |
| PRMT1          | 19         | C19orf76     | 19         | 7.0                   | No                  | Yes          |
| RPS4Y1         | Y          | RPS4X        | X          | 5.0                   | No                  | No           |
| STYXL1         | 7          | TMEM120A     | 7          | 5.0                   | No                  | Yes          |
| SCAMP2         | 15         | WDR72        | 15         | 5.0                   | Yes                 | No           |
| CLN6           | 15         | CALML4       | 15         | 5.0                   | No                  | Yes          |
| LOC728190      | 10         | SYT15        | 10         | 5.0                   | No                  | No           |
| HAVCR1         | 5          | TIMD4        | 5          | 5.0                   | No                  | Yes          |
| RPS27A         | 2          | UBA52        | 19         | 4.0                   | No                  | No           |
| SUGT1P         | 9          | NOL6         | 9          | 4.0                   | No                  | Yes          |
| SMOX           | 20         | LOC728228    | 20         | 4.0                   | No                  | Yes          |
| ARNTL2         | 12         | C12orf70     | 12         | 4.0                   | No                  | Yes          |
| RRM2           | 2          | C2orf48      | 2          | 4.0                   | No                  | Yes          |
| ANKRD39        | 2          | ANKRD23      | 2          | 3.0                   | No                  | Yes          |
| HSPA8          | 11         | RPS11        | 19         | 3.0                   | No                  | No           |
| LOC541471      | 2          | ANAPC1       | 2          | 3.0                   | No                  | No           |
| ANXA2          | 15         | RPL6         | 12         | 2.0                   | No                  | No           |
| ZNF606         | 19         | C19orf18     | 19         | 2.0                   | No                  | Yes          |
| NONO           | X          | RPL6         | 12         | 2.0                   | No                  | No           |
| UNQ2963        | 12         | CLSTN3       | 12         | 2.0                   | No                  | Yes          |
| ABCB8          | 7          | ACCN3        | 7          | 2.0                   | No                  | Yes          |
| HOXD11         | 2          | HOXD10       | 2          | 2.0                   | No                  | Yes          |
| UBXN2A         | 2          | MFSD2B       | 2          | 2.0                   | No                  | Yes          |
| POLA2          | 11         | CDC42EP2     | 11         | 2.0                   | No                  | Yes          |
| <b>M970109</b> |            |              |            |                       |                     |              |
| UCN2           | 3          | PFKFB4       | 3          | 57.0                  | No                  | Yes          |
| HNRNPU         | 1          | NCRNA00201   | 1          | 15.0                  | No                  | Yes          |
| CLR            | 12         | CLEC2D       | 12         | 9.0                   | No                  | Yes          |
| BTBD8          | 1          | KIAA1107     | 1          | 7.0                   | No                  | Yes          |
| SLC39A1        | 1          | CRTC2        | 1          | 6.0                   | No                  | Yes          |
| RASSF8         | 12         | SSPN         | 12         | 5.0                   | No                  | No           |
| <b>M980409</b> |            |              |            |                       |                     |              |
| CDK2           | 12         | RAB5B        | 12         | 30.0                  | Yes                 | Yes          |
| UCN2           | 3          | PFKFB4       | 3          | 24.0                  | No                  | Yes          |
| TLK2           | 17         | LOC100288069 | 1          | 15.0                  | No                  | No           |
| CLTC           | 17         | TMEM49       | 17         | 14.0                  | Yes                 | Yes          |
| SLC39A1        | 1          | CRTC2        | 1          | 13.0                  | No                  | Yes          |

Table 3 – Continued

| 5' Gene        | Chromosome | 3' Gene      | Chromosome | Supporting Read Pairs | Previously Reported | Read-through |
|----------------|------------|--------------|------------|-----------------------|---------------------|--------------|
| ABCB8          | 7          | ACCN3        | 7          | 9.0                   | No                  | Yes          |
| ARPC4          | 3          | TTL3         | 3          | 8.0                   | No                  | Yes          |
| ARL6IP1        | 16         | RPS15A       | 16         | 7.0                   | No                  | Yes          |
| GCN1L1         | 12         | PLA2G1B      | 12         | 7.0                   | Yes                 | No           |
| SDHAF2         | 11         | C11orf66     | 11         | 6.0                   | No                  | Yes          |
| STYXL1         | 7          | TMEM120A     | 7          | 6.0                   | No                  | Yes          |
| MRPS10         | 6          | GUCA1B       | 6          | 5.0                   | No                  | Yes          |
| OTUD6B         | 8          | LRRC69       | 8          | 4.0                   | No                  | Yes          |
| LOC728613      | 5          | SDHA         | 5          | 4.0                   | No                  | No           |
| POLA2          | 11         | CDC42EP2     | 11         | 3.0                   | No                  | Yes          |
| ADSL           | 22         | SGSM3        | 22         | 3.0                   | No                  | Yes          |
| CCDC15         | 11         | SLC37A2      | 11         | 3.0                   | Yes                 | Yes          |
| CLR            | 12         | CLEC2D       | 12         | 3.0                   | No                  | Yes          |
| ANKRD39        | 2          | ANKRD23      | 2          | 3.0                   | No                  | Yes          |
| <b>M990802</b> |            |              |            |                       |                     |              |
| ANKHD1         | 5          | C5orf32      | 5          | 65.0                  | Yes                 | No           |
| RB1            | 13         | ITM2B        | 13         | 26.0                  | Yes                 | No           |
| SMG5           | 1          | PAQR6        | 1          | 12.0                  | No                  | Yes          |
| LRRFIP1        | 2          | RBM44        | 2          | 6.0                   | No                  | Yes          |
| TPD52L2        | 20         | DNAJC5       | 20         | 5.0                   | No                  | Yes          |
| OR51B4         | 11         | HBE1         | 11         | 4.0                   | No                  | Yes          |
| WRB            | 21         | SH3BGR       | 21         | 3.0                   | No                  | No           |
| KIAA1467       | 12         | EMP1         | 12         | 3.0                   | No                  | No           |
| RPL11          | 1          | TCEB3        | 1          | 3.0                   | No                  | Yes          |
| YARS2          | 12         | NAP1L1       | 12         | 3.0                   | No                  | No           |
| TTL12          | 22         | EIF1         | 17         | 3.0                   | No                  | No           |
| NFX1           | 9          | MTRNR2L8     | 11         | 2.0                   | No                  | No           |
| <b>M980928</b> |            |              |            |                       |                     |              |
| HOXD4          | 2          | HOXD3        | 2          | 9.0                   | No                  | Yes          |
| NAIP           | 5          | OCN          | 5          | 6.0                   | No                  | No           |
| SLAMF9         | 1          | IGSF9        | 1          | 2.0                   | No                  | Yes          |
| <b>M990514</b> |            |              |            |                       |                     |              |
| UCN2           | 3          | PFKFB4       | 3          | 19.0                  | No                  | Yes          |
| NADSYN1        | 11         | LOC100188947 | 10         | 17.0                  | No                  | No           |
| PRMT1          | 19         | C19orf76     | 19         | 16.0                  | No                  | Yes          |
| COL7A1         | 3          | UCN2         | 3          | 15.0                  | No                  | Yes          |
| PACSIN2        | 22         | ARFGAP3      | 22         | 13.0                  | No                  | Yes          |
| CECR7          | 22         | IL17RA       | 22         | 10.0                  | No                  | Yes          |
| XRCC1          | 19         | ETHE1        | 19         | 10.0                  | No                  | No           |
| SLC39A1        | 1          | CRTC2        | 1          | 9.0                   | No                  | Yes          |
| GALNT8         | 12         | KCNA6        | 12         | 8.0                   | No                  | Yes          |
| WDR35          | 2          | TTC32        | 2          | 8.0                   | Yes                 | Yes          |
| C14orf133      | 14         | C14orf148    | 14         | 7.0                   | No                  | Yes          |
| MRPL20         | 1          | CCNL2        | 1          | 6.0                   | No                  | Yes          |
| C7orf50        | 7          | COX19        | 7          | 6.0                   | No                  | No           |
| PTPRG          | 3          | C3orf14      | 3          | 6.0                   | Yes                 | Yes          |
| DMPK           | 19         | SIX5         | 19         | 6.0                   | No                  | Yes          |
| SLC29A1        | 6          | HSP90AB1     | 6          | 6.0                   | No                  | Yes          |

Table 3 – Continued

| 5' Gene        | Chromosome | 3' Gene  | Chromosome | Supporting Read Pairs | Previously Reported | Read-through |
|----------------|------------|----------|------------|-----------------------|---------------------|--------------|
| GPR153         | 1          | ICMT     | 1          | 6.0                   | Yes                 | No           |
| C7orf68        | 7          | EFCAB3   | 17         | 5.0                   | No                  | No           |
| PIM2           | X          | SLC35A2  | X          | 5.0                   | No                  | Yes          |
| USP36          | 17         | CYTH1    | 17         | 5.0                   | No                  | Yes          |
| NDUFS2         | 1          | FCER1G   | 1          | 5.0                   | No                  | Yes          |
| UBE4A          | 11         | ATP5L    | 11         | 5.0                   | No                  | Yes          |
| STYXL1         | 7          | TMEM120A | 7          | 4.0                   | No                  | Yes          |
| PKD1           | 16         | NPIP     | 16         | 4.0                   | No                  | No           |
| CADM4          | 19         | ZNF428   | 19         | 4.0                   | No                  | Yes          |
| SHC1           | 1          | PYGO2    | 1          | 4.0                   | No                  | Yes          |
| CD151          | 11         | TSPAN4   | 11         | 4.0                   | Yes                 | Yes          |
| KDM6B          | 17         | TMEM88   | 17         | 4.0                   | No                  | Yes          |
| BCL2L2         | 14         | PABPN1   | 14         | 4.0                   | No                  | Yes          |
| TPD52L2        | 20         | DNAJC5   | 20         | 4.0                   | No                  | Yes          |
| ST6GALNAC6     | 9          | AK1      | 9          | 4.0                   | No                  | Yes          |
| WRB            | 21         | SH3BGR   | 21         | 4.0                   | No                  | No           |
| SIRT7          | 17         | PCYT2    | 17         | 4.0                   | No                  | Yes          |
| ODF3B          | 22         | TYMP     | 22         | 4.0                   | No                  | Yes          |
| SNX8           | 7          | FTSJ2    | 7          | 3.0                   | No                  | No           |
| POLA2          | 11         | CDC42EP2 | 11         | 3.0                   | No                  | Yes          |
| PGAP1          | 2          | C2orf66  | 2          | 3.0                   | No                  | Yes          |
| LMCD1          | 3          | NAG-7    | 3          | 3.0                   | No                  | Yes          |
| TSEN34         | 19         | RPS9     | 19         | 3.0                   | No                  | No           |
| CLR            | 12         | CLEC2D   | 12         | 3.0                   | No                  | No           |
| SIDT2          | 11         | TAGLN    | 11         | 3.0                   | No                  | Yes          |
| C8orf58        | 8          | KIAA1967 | 8          | 3.0                   | No                  | Yes          |
| UBE2J2         | 1          | FAM132A  | 1          | 2.0                   | No                  | Yes          |
| CUEDC1         | 17         | MRPS23   | 17         | 2.0                   | No                  | Yes          |
| C1RL           | 12         | C1R      | 12         | 2.0                   | No                  | Yes          |
| GPR155         | 2          | C1R1     | 2          | 2.0                   | No                  | No           |
| <b>501_Mel</b> |            |          |            |                       |                     |              |
| CCT3           | 1          | C1orf61  | 1          | 84.0                  | Yes                 | No           |
| SLC12A7        | 5          | C11orf67 | 11         | 77.0                  | Yes                 | No           |
| GNA12          | 7          | SHANK2   | 11         | 36.0                  | Yes                 | No           |
| FCHSD2         | 11         | P2RY6    | 11         | 21.0                  | No                  | No           |
| CLN6           | 15         | CALML4   | 15         | 5.0                   | No                  | Yes          |
| ANP32B         | 9          | ATP5I    | 4          | 5.0                   | No                  | No           |
| RAB6A          | 11         | EYS      | 6          | 4.0                   | No                  | No           |
| MANBA          | 4          | UBE2D3   | 4          | 4.0                   | No                  | No           |
| RBBP5          | 1          | NUAK2    | 1          | 4.0                   | No                  | No           |
| DUS3L          | 19         | PRR22    | 19         | 3.0                   | No                  | Yes          |
| C15orf57       | 15         | CBX3     | 7          | 3.0                   | No                  | No           |
| FRG1           | 4          | GOSR1    | 17         | 3.0                   | No                  | No           |
| TBCEL          | 11         | TECTA    | 11         | 2.0                   | No                  | Yes          |
| CLR            | 12         | CLEC2D   | 12         | 2.0                   | No                  | Yes          |
| PARP1          | 1          | MIXL1    | 1          | 2.0                   | Yes                 | No           |
| <b>MeWo</b>    |            |          |            |                       |                     |              |
| ARL6IP1        | 16         | RPS15A   | 16         | 10.0                  | No                  | Yes          |

Table 3 – Continued

| 5' Gene    | Chromosome | 3' Gene    | Chromosome | Supporting Read Pairs | Previously Reported | Read-through |
|------------|------------|------------|------------|-----------------------|---------------------|--------------|
| METTL10    | 10         | FAM53B     | 10         | 7.0                   | No                  | Yes          |
| ZNF654     | 3          | C3orf38    | 3          | 5.0                   | No                  | Yes          |
| TRAK2      | 2          | ALS2CR12   | 2          | 4.0                   | No                  | Yes          |
| UBA2       | 19         | WTIP       | 19         | 4.0                   | No                  | Yes          |
| STYXL1     | 7          | TMEM120A   | 7          | 3.0                   | No                  | Yes          |
| FBXL19     | 16         | ORAI3      | 16         | 3.0                   | No                  | Yes          |
| CORO1C     | 12         | SELPLG     | 12         | 2.0                   | No                  | Yes          |
| WRN        | 8          | FIBP       | 11         | 2.0                   | No                  | No           |
| SEMA4C     | 2          | ANKRD39    | 2          | 2.0                   | No                  | Yes          |
| HARS       | 5          | DND1       | 5          | 2.0                   | No                  | Yes          |
| C20orf29   | 20         | MAVS       | 20         | 2.0                   | No                  | Yes          |
| <b>UHR</b> |            |            |            |                       |                     |              |
| BCAS4      | 20         | BCAS3      | 17         | 75.0                  | Yes                 | No           |
| GAS6       | 13         | RASA3      | 13         | 33.0                  | Yes                 | No           |
| AP3D1      | 19         | JSRP1      | 19         | 16.0                  | No                  | No           |
| ARFGEF2    | 20         | SULF2      | 20         | 13.0                  | Yes                 | No           |
| CLN6       | 15         | CALML4     | 15         | 11.0                  | No                  | Yes          |
| RPS6KB1    | 17         | TMEM49     | 17         | 8.0                   | Yes                 | No           |
| B3GAT3     | 11         | GANAB      | 11         | 7.0                   | No                  | Yes          |
| BCR        | 22         | ABL1       | 9          | 7.0                   | Yes                 | No           |
| RRM2       | 2          | C2orf48    | 2          | 7.0                   | No                  | Yes          |
| ADCK4      | 19         | NUMBL      | 19         | 6.0                   | Yes                 | Yes          |
| RPLP0      | 12         | EEF1AL7    | 4          | 6.0                   | No                  | No           |
| SYTL2      | 11         | PICALM     | 11         | 6.0                   | No                  | No           |
| RPL3       | 22         | EEF1AL7    | 4          | 5.0                   | No                  | No           |
| SIDT2      | 11         | TAGLN      | 11         | 5.0                   | No                  | Yes          |
| HNRNPUL2   | 11         | C11orf49   | 11         | 5.0                   | No                  | No           |
| GCN1L1     | 12         | MSI1       | 12         | 5.0                   | No                  | No           |
| NUP214     | 9          | XKR3       | 22         | 5.0                   | Yes                 | No           |
| CCDC123    | 19         | PEPD       | 19         | 4.8                   | Yes                 | No           |
| TANC2      | 17         | CA4        | 17         | 4.0                   | No                  | No           |
| EEF1AL7    | 4          | GAPDH      | 12         | 4.0                   | No                  | No           |
| ZFP41      | 8          | GLI4       | 8          | 4.0                   | Yes                 | Yes          |
| VAMP8      | 2          | VAMP5      | 2          | 4.0                   | Yes                 | Yes          |
| HNRNPU     | 1          | NCRNA00201 | 1          | 4.0                   | No                  | Yes          |
| EEF1AL7    | 4          | EEF2       | 19         | 4.0                   | No                  | No           |
| LIME1      | 20         | SLC2A4RG   | 20         | 4.0                   | No                  | Yes          |
| SAPS3      | 11         | DPP3       | 11         | 4.0                   | No                  | No           |
| SSSCA1     | 11         | FAM89B     | 11         | 4.0                   | No                  | Yes          |
| VPS72      | 1          | TMOD4      | 1          | 3.0                   | No                  | Yes          |
| SMG5       | 1          | PAQR6      | 1          | 3.0                   | No                  | Yes          |
| ANKRD39    | 2          | ANKRD23    | 2          | 3.0                   | Yes                 | Yes          |
| RPS10      | 6          | NUDT3      | 6          | 3.0                   | No                  | Yes          |
| POLA2      | 11         | CDC42EP2   | 11         | 3.0                   | Yes                 | Yes          |
| MRPS10     | 6          | GUCA1B     | 6          | 3.0                   | No                  | Yes          |
| SUGT1P     | 9          | NOL6       | 9          | 3.0                   | No                  | Yes          |
| CTNNBIP1   | 1          | CLSTN1     | 1          | 3.0                   | No                  | Yes          |
| VIM        | 10         | EEF1AL7    | 4          | 3.0                   | No                  | No           |

| Table 3 – Continued |            |           |            |                       |                     |              |
|---------------------|------------|-----------|------------|-----------------------|---------------------|--------------|
| 5' Gene             | Chromosome | 3' Gene   | Chromosome | Supporting Read Pairs | Previously Reported | Read-through |
| AHCYL1              | 1          | CFL1      | 11         | 2.0                   | No                  | No           |
| CBFA2T3             | 16         | LOC390748 | 16         | 2.0                   | No                  | Yes          |
| TAGLN2              | 1          | CCDC19    | 1          | 2.0                   | No                  | Yes          |
| FKBP4               | 12         | ITFG2     | 12         | 2.0                   | No                  | Yes          |
| EEF2                | 19         | EEF1AL7   | 4          | 2.0                   | No                  | No           |
| EEF1AL7             | 4          | SND1      | 7          | 2.0                   | No                  | No           |
| BAIAP2L2            | 22         | SLC16A8   | 22         | 2.0                   | No                  | Yes          |
| LOC442454           | X          | ENO1      | 1          | 2.0                   | No                  | No           |
| ALKBH6              | 19         | C19orf46  | 19         | 2.0                   | No                  | Yes          |
| PHRF1               | 11         | DRD4      | 11         | 2.0                   | No                  | No           |
| SPN                 | 16         | QPRT      | 16         | 2.0                   | No                  | Yes          |

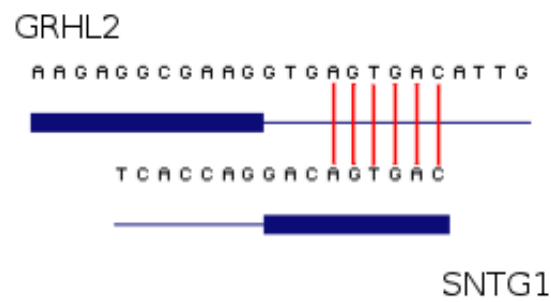

Figure 2: A short homologous sequence near the fusion site of GRHL2 and SNTG1.

### Figure 3 - Ambiguous fusion sequences.

Below is the sequence surrounding each fusion site for the ambiguous fusions reported in the results.

#### HOMEZ-MYH6

CTCGGAGCGGCCGCACCGGGCAGCAACCCCACTCCCACTCGGAGGCCCCCTGCCCTCTCCCC  
ACTTCCCCCGGCCATGGTGGGAGGCTGGGAGCCGCCGCCCGGGCTGGACTGC GGCCTCCC  
TGGAGCACGAGGAGGGCAAGATCCTCCGGGCCAGCTAGAGTTCAACCAGATCAAGGCAGAG  
ATCGAGCGGAAGCTGGCAGAGAAGGACGAGGAGATGGAACAGGCCAAGCGCAACCACCAGCG  
GGTGGTGGACTCGCTGCAGACCTCCCTGGATGCAGAGACACGCAGCCGCAACGAGGTCCTGA  
G

#### KIAA1267-ARL17A

GGGGAGTCTGATATTGAAGAGGAAGAACTGACCAGAGCTGATCCCGAGCAGCGTCATGTACC  
CCTGAGACGCAGGTCAGAATGAAAATGGGCTGCAGACCGGGCAGCTATTGTCAGCCGCTGGA  
ACTGGCTTCAGGCTCATGTTTCTGACTTGGAAATATCGAATTCGTCAGCAAACAGACATTTACA  
AACAGATACGTGCTAATAAG GTTTCTGTGTGGAGACAGTAGAATATAAAAAATAACACCTTCG  
CTGTCTGGGATGTTGGCAGCCACTTCAAATCAGACCTCTGTGGCAGCATTFTTTCCAGAACA  
CAAAAGGTGCCAGAAGCCAGGAAGCACACATCAAGGCTCACTTGCCAGCGGGGTGCTGCCA  
ATAAAATGTAGTCACGTGGAATTTGGAATGTGG

Note that this fusion sequence matches GenBank mRNA accession BC006271.1.

#### CPEB1-RPS17

GCCGACAGTAACTTTGTCCGGAGCCCATCTCAGAGGCTTGACCCAGCAGGACGGTGTGTTGTC  
GGTGTCTGTCATGGAATGCTAAATGCTGAGGCCCTGGCAGCCATCTTGAACGACCTATTTGG  
TGGAGTGGTGTATGCCGGGATTGACACAGATAAGCACAAGTATCCATTGGTTCTGCTCGTG  
TGACTTTCAATAACCAACGGAGTTACCTGAAAGCAGTCAGCGCTGCTTTTGTGGAGATCAAAA  
CCACCAAGTTCACAAAGAAGGTTACAGATTGACCCCTACCTAGAAGATTCTCTGTGTCATATCT  
GCAGTTCTCAGCCTGGTCCTTTCTTCTGTCGAGATCAG GTTTCTCTTTTACCAAGGACCCGC  
CAACATGGGCCGCGTTTCGCACCAAAACCGTGAAGAAGCGGCCCGGGTCATCATAGAAAAGT  
ACTACACGCGCCTGGGCAACGACTTCCACACGAACAAGCGCGTGTGCGAGGAGATCGCCATT  
ATCCCCAGCAAAAAGCTCCGCAACAAGATAGCAGGTTATGTCACGCATCTGATGAAGCGAATT  
CAGAGAGGCCAGTAAGAGGTATCTCCATCAAGCTGCAGGAGGAGGAGAGAGAAAAGGAGAGA  
CAATTATGTTCTGAGGTCTCAGCCTTGGATCAGGAGATTATTGAAGTAGATCCTGACACTAA  
GGAAATGCTGAAGCTTTTGGACTTCGGCAGTCTGTCCAACCTTCAGGTCCTCAGCCTACAGT  
TGGGATGAATTTCAAAAACGCTCGGGGACCTGTTTGAATTTTCTGTAGTGTGCTGATTATTT  
TCAATAAATCTGGG

#### PPIP5K1-CATSPER2

GTCCAGGAAAGGCATCAGATGAACCAGACCGGGCATTGCAGACTTCACCCAGCCTCCTGAG  
GGCCCTGGCCTTCCGAGGAGATCACCCCTCATTGTAACCGAAAAGCTGGTTCCATGGAGGTA  
CTTTCTGAGACTTCATCCTCGAGGCCTGGTGGCTACCGGCTCTTTTCATCTTCACGGCCACCC  
ACAGAAATGAAGCAGAGTGGCCTAG ATCCTTCCCGCCAGAAGAACTTGTATTGGGAGATCA  
ACACCAGCTAGTGCCTTTCTCTATAAAGCCTCAGCGTATAGAACAGATTTACATGCCAGAG  
GCTGTTGAGCAGGCTTCATGTGCGCTGCAGTCAGAGGCCACCT
