# Supplementary material
Source: PubMed Central journal article supplement (PMC3072550)
Supplement: supp_btr085_supplement.pdf [file supp_btr085_supplement.pdf]

Table 1: All gene fusions nominated by discordant read pairs in the simulated data.

| <b>Upstream Partner</b> | <b>Downstream Partner</b> |
|-------------------------|---------------------------|
| FOXO3B                  | EIF3C                     |
| FOXO3B                  | EIF3CL                    |
| FOXO3                   | EIF3C                     |
| FOXO3                   | EIF3CL                    |
| FRG1B                   | LOC162632                 |
| FRG1B                   | LOC220594                 |
| FRG1B                   | USP32                     |
| FRG1B                   | USP6                      |
| FRG1                    | LOC162632                 |
| FRG1                    | LOC220594                 |
| FRG1                    | USP32                     |
| FRG1                    | USP6                      |
| LOC283788               | LOC162632                 |
| LOC283788               | LOC220594                 |
| LOC283788               | USP32                     |
| LOC283788               | USP6                      |
| LOC642236               | LOC162632                 |
| LOC642236               | LOC220594                 |
| LOC642236               | USP32                     |
| LOC642236               | USP6                      |
| MAGED4B                 | MBD3L2                    |
| MAGED4B                 | MBD3L3                    |
| MAGED4B                 | MBD3L4                    |
| MAGED4B                 | MBD3L5                    |
| MAGED4                  | MBD3L2                    |
| MAGED4                  | MBD3L3                    |
| MAGED4                  | MBD3L4                    |
| MAGED4                  | MBD3L5                    |
| PSG10                   | PHB                       |
| PSG10                   | ZNF607                    |
| PSG11                   | PHB                       |
| PSG11                   | ZNF607                    |
| PSG1                    | PHB                       |
| PSG1                    | ZNF607                    |
| PSG2                    | PHB                       |
| PSG2                    | ZNF607                    |
| PSG3                    | PHB                       |
| PSG3                    | ZNF607                    |
| PSG4                    | PHB                       |
| PSG4                    | ZNF607                    |
| PSG5                    | PHB                       |
| PSG5                    | ZNF607                    |
| PSG6                    | PHB                       |
| PSG6                    | ZNF607                    |
| PSG7                    | PHB                       |
| PSG7                    | ZNF607                    |
| PSG8                    | PHB                       |
| PSG8                    | ZNF607                    |
| PSG9                    | PHB                       |
| PSG9                    | ZNF607                    |
| SMN1                    | CSAG1                     |
| SMN1                    | CSAG2                     |
| SMN1                    | CSAG3                     |
| SMN2                    | CSAG1                     |
| SMN2                    | CSAG2                     |
| SMN2                    | CSAG3                     |

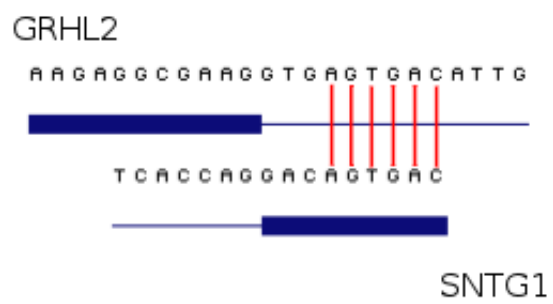

Figure 1: A short homologous sequence near the fusion site of GRHL2 and SNTG1.
